# Supplementary material for: PP2Acα-B′/PR61 Holoenzyme of Toxoplasma gondii Is Required for the Amylopectin Metabolism and Proliferation of Tachyzoites
Source: PubMed Central journal article supplement (PMC10269777; doi:10.1128/spectrum.00104-23), 2023-05-18
Supplement: spectrum.00104-23-s0001.pdf [file spectrum.00104-23-s0001.pdf]

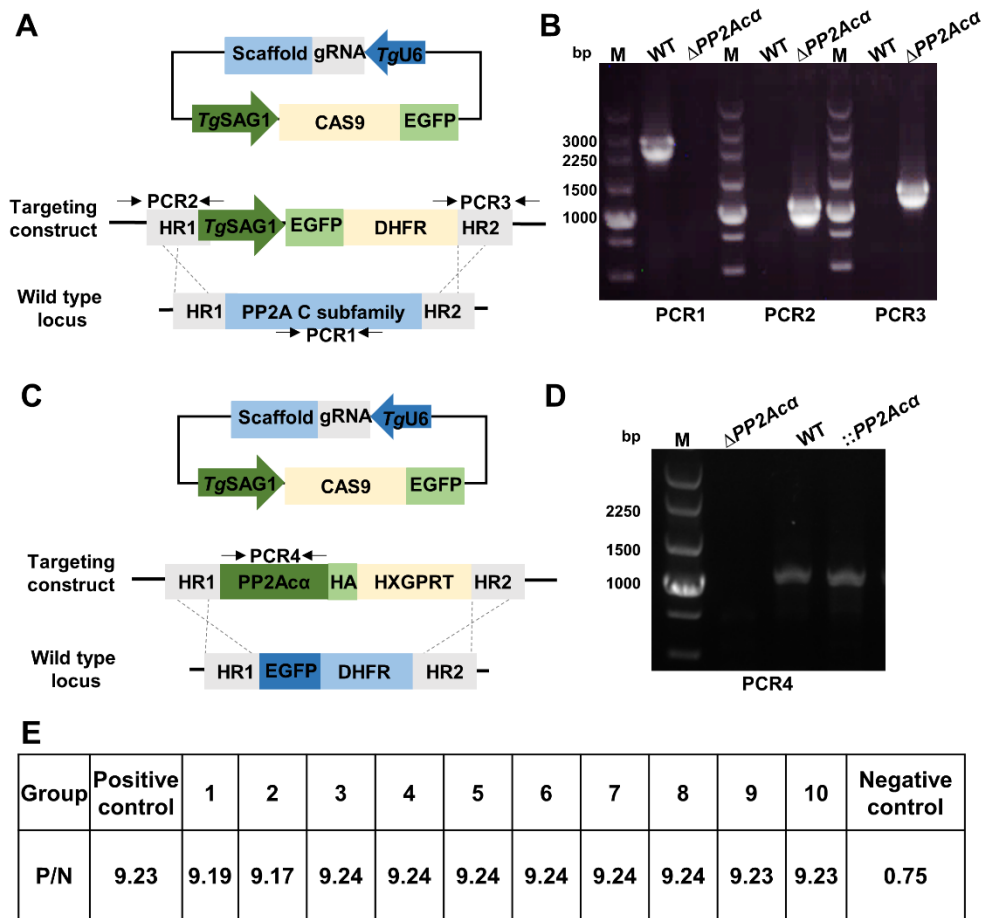

**Fig S1.** Knockout and add-back of *PP2Acα* gene in tachyzoites of *Toxoplasma gondii*.

(A) Schematic illustration of knocking out *PP2Ac* subfamily by CRISPR/Cas9-mediated homologous gene replacement in the  $RH\Delta ku80\Delta hxpRT$  cells ( $RH\Delta ku80$ ). (B) Electrophoresis of PCR amplicons as indicated WT: Parental cells. (C) Schematic illustration of adding back *PP2Acα* by CRISPR/Cas9-mediated homologous gene replacement in the  $\Delta PP2Ac\alpha$  knockouts. (D) Electrophoresis of PCR amplicons as indicated. WT: Parental cells. (E) Positive/negative (P/N) OD ratios of antibodies in the serum of mice survived from  $\Delta PP2Ac\alpha$  tachyzoites infection. P/N ratio greater than 2.1 is considered positive for *Toxoplasma* infection.

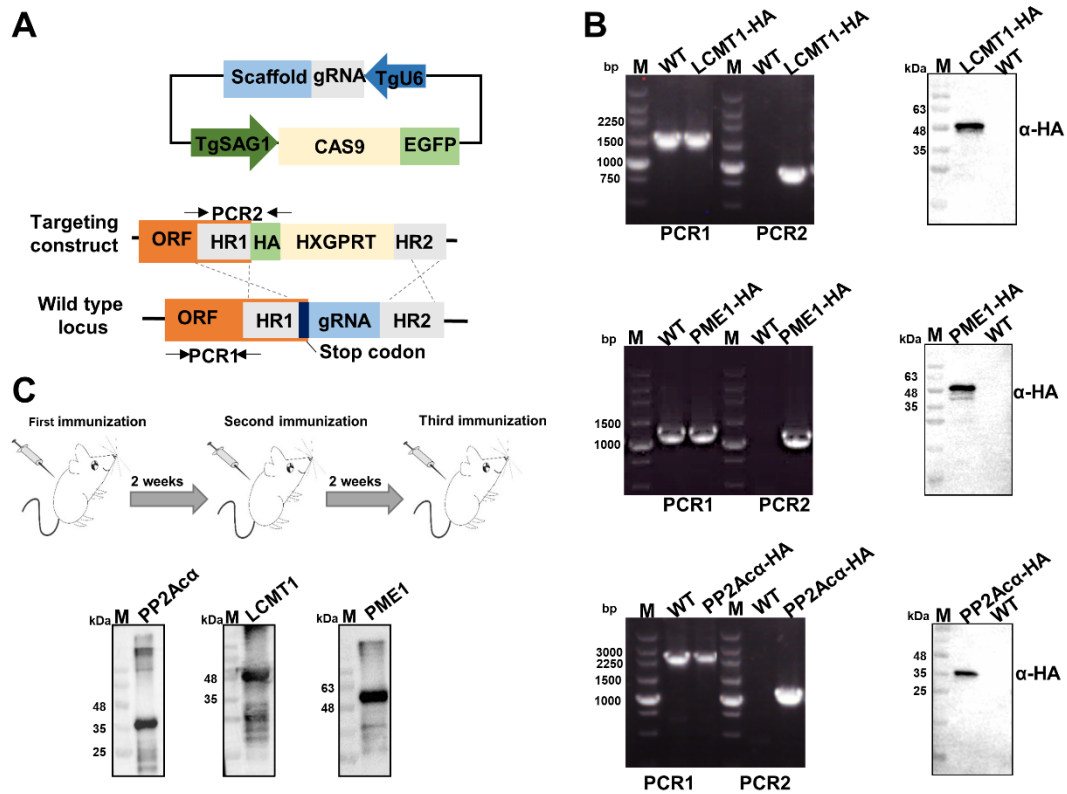

**Fig S2.** Endogenous 3 $\times$  hemagglutinin tagged cells and polyclonal antibodies against PP2Ac $\alpha$  and its methylation regulators. (A) Schematic illustration of PP2Ac $\alpha$ -3HA, leucine carboxyl methyl transferase 1 (LCMT1) -3HA and protein phosphatase methylesterase 1 (PME1)-3HA by CRISPR/Cas9 tagging strategy in *RH $\Delta$ ku80*. Three consecutive hemagglutinin (HA) tags are included. (B) PCR (left) and Western blot (WB, right) of representatives expressing PP2Ac $\alpha$ -HA, LCMT1-3HA and PME1-3HA. Anti-HA antibodies are used in Western blot. (C) Western blotting analysis of polyclonal antibodies against PP2Ac $\alpha$ , LCMT1 or PME1.

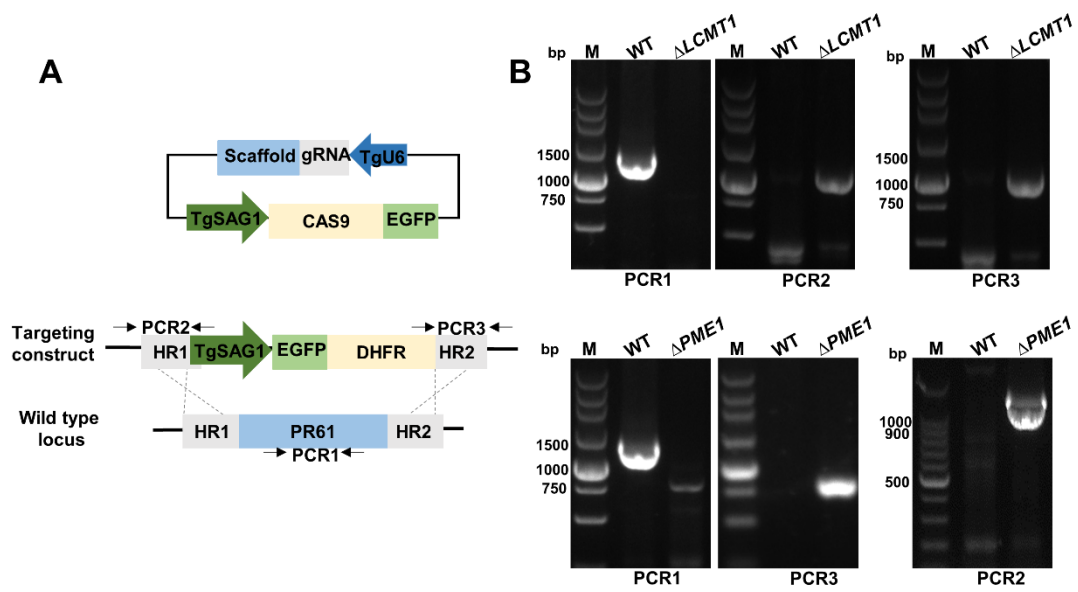

**Fig S3.** Knockout of *LCMT1* and *PME1* genes in tachyzoites of *Toxoplasma gondii*. (A) Schematic illustration of the genetic deletion of *LCMT1* and *PME1* by CRISPR/Cas9 tagging strategy in RH $\Delta$ ku80. WT: parental cells;  $\Delta$ *LCMT1*: tachyzoite with *LCMT1* knockout;  $\Delta$ *PME1*: tachyzoite with *PME1* knockout. (B) PCR identification of the  $\Delta$ *LCMT1* or  $\Delta$ *PME1* representative clones.

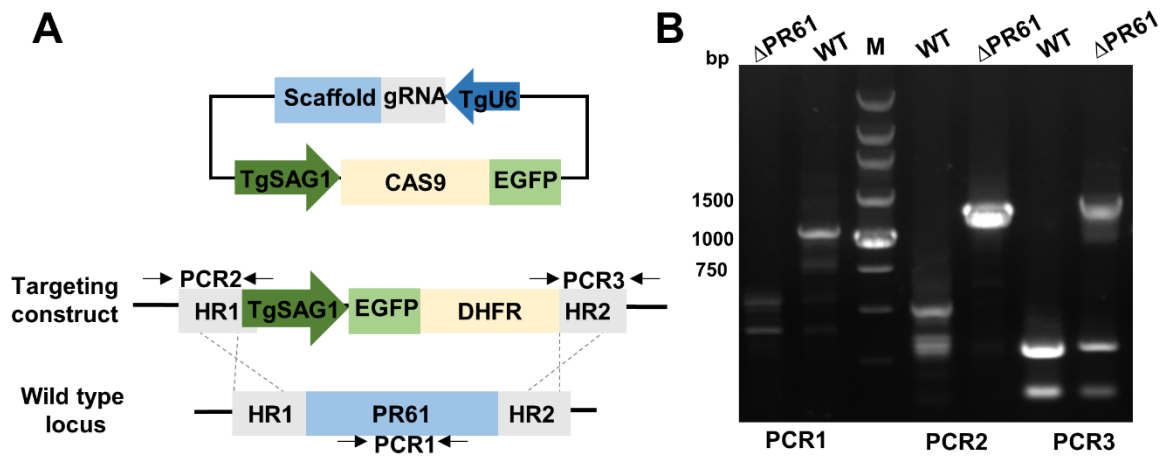

**Fig S4.** Knockout of B'/PR61 in tachyzoites of *Toxoplasma gondii*. (A) Schematic illustration of knocking out B'/PR61 by CRISPR/Cas9-mediated homologous gene replacement in the RH $\Delta ku80$ . WT: parental cells;  $\Delta PR61$ : tachyzoite with PR61 knockout; (B) PCR identification of the  $\Delta PR61$  tachyzoites representative clones.

**Table S1** Primers used in the current study.

| Name                          | Sequence (5' - 3')                                                         |
|-------------------------------|----------------------------------------------------------------------------|
| PP2A $\alpha$ -KO sgRNA F     | AGTTGTTGGGGCAAGAAGAGTTGCG                                                  |
| PP2A $\alpha$ -KO sgRNA R     | AAACCGCAACTCTTCTTGCCCAAC                                                   |
| PP2A $\alpha$ -KO donor F     | TTTTTCTTCCACACACTCTGCCGTTTCTCCTTTCTTGTACCTCCGCAAAGCTTTTACATCCGTTGCCTTTTC   |
| PP2A $\alpha$ -KO donor R     | CGTTTGTCTGGCCTCCTCAAGCCTTCGTTTGTGTTTGTTCGGTCTCCCCGGGGCAAGAATTGTGTTAACCGGT  |
| PP2A $\alpha$ -KO screen F1   | GAGTGCCTGCGCAAATATGG                                                       |
| PP2A $\alpha$ -KO screen R1   | GCAGAAGCGACGGATTGAAC                                                       |
| PP2A $\alpha$ -KO screen F2   | TCAGATCCCTGGAGACATCCGAA                                                    |
| PP2A $\alpha$ -KO screen R2   | GTTGCGGCACTGTGAGCACTGAT                                                    |
| PP2A $\alpha$ -KO screen F3   | GCTTCCTATTCGCTTTTGACGCT                                                    |
| PP2A $\alpha$ -KO screen R3   | TTCTGTTACCGACTTTTTTTGC                                                     |
| PP2A $\alpha$ -Comp sgRNA F   | AGTTACACGCTTTGTGGTGAGAAG                                                   |
| PP2A $\alpha$ -Comp sgRNA R   | AAACCTTCTCACCACAAAGCGTGT                                                   |
| PP2A $\alpha$ -Comp donor F   | TTTTTCTTCCACACACTCTGCCGTTTCTCCTTTCTTGTACCTCCGCAATGTCGGGTGCAACTCCA          |
| PP2A $\alpha$ -Comp donor R   | TCTTTTCTTCGCATTCTTCTCATCGCCTCGCATCCTTCTCGCCTGTGATAGGGCGAATTGGAGCTCC        |
| PP2A $\alpha$ -Comp screen F1 | GAGTGCCTGCGCAAATATGG                                                       |
| PP2A $\alpha$ -Comp screen R1 | GCAGAAGCGACGGATTGAAC                                                       |
| PP2A $\beta$ -KO sgRNA F      | AGTTAGAGGCGCCGGGATGCTCTG                                                   |
| PP2A $\beta$ -KO sgRNA R      | AAACCAGAGCATCCCGGCGCCTCT                                                   |
| PP2A $\beta$ -KO donor F      | GCTGCACAAGTTGAGCACTCCCGTTCTTGACGCGAGTAGCTGTACCAAGCTTTTACATCCGTTGCCTTTTCCA  |
| PP2A $\beta$ -KO donor R      | GTTGAACAGCAAGCGGTCGAGCGAAGAAGACTGCAGCCTAGTCATCTCGGGGCAAGAATTGTGTTAACCGGTTC |
| PP4c-KO sgRNA F               | AGTTATGGGAGCAGCACCGTTTGG                                                   |
| PP4c-KO sgRNA R               | AAACCCAAACGGTGTCTGCCAT                                                     |
| PP4c-KO donor F               | CCTCCTCCTACTCTTCCGTTCTACGCTTCTGCTGCTCTCCTCTCAAGCTTTTACATCCGTTGCCTTTTCCA    |
| PP4c-KO donor R               | AGAGACGCGGAATTCGAAGAGAACGTTGAACTCCAAACGTCGCCTGCTGGGGCAAGAATTGTGTTAACCGGTTC |

---

|                    |                                                                             |
|--------------------|-----------------------------------------------------------------------------|
| PP6c-KO sgRNA F    | AGTTGCGACTGGCAAGACTTGGTCA                                                   |
| PP6c-KO sgRNA R    | AAACTGACCAAGTCTTGCCAGTCGC                                                   |
| PP6c-KO donor F    | GCATCGCTTCGTTCTCCCACAGACCAGCACTGGCGGGTCCGACACCAGAAGCTTTTACATCCGTTGCCTTTTCCA |
| PP6c-KO donor R    | TCCCCCTGCCTACCTCCTCCTCCCCCTCCCCCTACGCATACGCTGTATCGGGGGCAAGAATTGTGTTAACCGGTC |
| LCMT1-KO sgRNA F   | AGTTGTCAGGCTCACTACTCGATTG                                                   |
| LCMT1-KO sgRNA R   | AAACCAATCGAGTAGTGAGCCTGAC                                                   |
| LCMT1-KO donor F   | GAGTCGCGTGTCTCAGTGATCAGTCACGCCCCGAGCACACGAGATAATTAAGCTTTTACATCCGTTGCCTTTTC  |
| LCMT1-KO donor R   | GAGGTGCCACGAGGACAAAGAATTTGAGTGTGGAACCTAGTGGACTTCGGGGGCAAGAATTGTGTTAACCGGT   |
| LCMT1-KO screen F1 | TGAAATCCGCTCCCAGTGTC                                                        |
| LCMT1-KO screen R1 | GGGTCATCTTCTCGTTGCCA                                                        |
| LCMT1-KO screen F2 | GGACGGTTTGAAGGCGTTTC                                                        |
| LCMT1-KO screen R2 | CACGCGTCTCAAGGTTTGTG                                                        |
| LCMT1-KO screen F3 | TGCAGGTGTCACATCCACAA                                                        |
| LCMT1-KO screen R3 | CTCCTAGGTGTCTCGTTGGC                                                        |
| PME1-KO sgRNA F    | AGTTAAAGTGGGCGGAGGCTCCCCG                                                   |
| PME1-KO sgRNA R    | AAACCGGGAGCCTCCGCCACTTT                                                     |
| PME1-KO donor F    | GTCGCTTGCTCCTCGAGTGTCAAGCCGGCCTCGCCTCTCGTCGAAAAGAAGCTTTTACATCCGTTGCCTTTTC   |
| PME1-KO donor R    | CGTGGGGTTCGTCGACTTCAGGCGGCTCCTAGTGTATGCACACTGCGTGGGGGCAAGAATTGTGTTAACCGGT   |
| PME1-KO screen F1  | AAGAGGCTTCCAACGGTGTT                                                        |
| PME1-KO screen R1  | CCCTGCACAGATAAGCACCT                                                        |
| PME1-KO screen F2  | AGGACTTTATGCGGCCTTCC                                                        |
| PME1-KO screen R2  | CTACGAAACGTTACACGCC                                                         |
| PME1-KO screen F3  | TTCACCGCCGAGGATTTTGA                                                        |
| PME1-KO screen R3  | GCAACGAAACAGACAACGCA                                                        |
| PR61-KO sgRNA F    | AGTTGCCTCCGCCAGGAGGAGGCG                                                    |
| PR61-KO sgRNA R    | AAACCGCCTCCTCCTGGCGGAGGC                                                    |

---

---

|                            |                                                                                         |
|----------------------------|-----------------------------------------------------------------------------------------|
| PR61-KO donor F            | GGTCTGCCTTGCGTCTCAGTTTGCTCCCATAATGCTTTCGACTCTCTCCCAGGTTAGCCTCCAAGCTTTTACATCCGTTGCCTTTTC |
| PR61-KO donor R            | GTCAGAAACTTTGAGGAAGACGTGCGAACGCGCACACCTTCTCCCAGGAGAGCGGAGACGGGGCAAGAATTGTGTTAACCGGT     |
| PR61-KO screen F1          | ATTCTGCTGAACACGCAACCTC                                                                  |
| PR61-KO screen R1          | AAAAGTCGCGTCGGCGGA                                                                      |
| PR61-KO screen F2          | CGGCATTTTCCATTCGGCA                                                                     |
| PR61-KO screen R2          | TCAAATGCCTCGTGTGGGAA                                                                    |
| PR61-KO screen F3          | TCAAATGCCTCGTGTGGGAA                                                                    |
| PR61-KO screen R3          | GCTGCGCCTTCTGTCAAAA                                                                     |
| PP2A $\alpha$ -HA sgRNA F  | AGTTGAACCACGGCGCGTTTGTC                                                                 |
| PP2A $\alpha$ -HA sgRNA R  | AAACGGACAAACGCGCCGTGGTTC                                                                |
| PP2A $\alpha$ -HA donor F  | CAAGCCTCGGGAGCAGACATGCAGAAACGAATTCCGGACTACTTCTGGGCGGAGAAATCTCCCTGAGAA                   |
| PP2A $\alpha$ -HA donor R  | TCTTTTCTTCGCATTCTTCTCATCGCCTCGCATCCTTCTCGCCTGTGATAGGGCGAATTGGAGCTCC                     |
| PP2A $\alpha$ -HA screen F | GCCGAACTATTGCTACCGCTGT                                                                  |
| PP2A $\alpha$ -HA screen R | GCCATCGGACATAGGACTCATT                                                                  |
| LCMT1-HA sgRNA F           | AGTTGGACTCCAATCAGTTAGCCG                                                                |
| LCMT1-HA sgRNA R           | AAACCGGCTAACTGATTGGAGTCC                                                                |
| LCMT1-HA donor F           | GAGAAGATGACCCTGCCGCGCCTGAAGCAGATCTACGAAGGCATGAATGGCGGAGAAATCTCCCTGAGAA                  |
| LCMT1-HA donor R           | AAAAGCGCGGCTTCCGAGGAGTCGGAGGAAAGAATCTCAATTCACAGAATAGGGCGAATTGGAGCTCC                    |
| LCMT1-HA screen F          | GTGGGGCAGAGTTCTCAAAG                                                                    |
| LCMT1-HA screen R          | CCATCGGACATAGGACTCAT                                                                    |
| PME1-HA sgRNA F            | AGTTGTGGGGTTCGTCGACTTCAGG                                                               |
| PME1-HA sgRNA R            | AAACCCTGAAGTCGACGACCCAC                                                                 |
| PME1-HA donor F            | TCTGTCCAGCCTTGCGCGTTTACCCTCTGCGCCGAAAGCCTGCGAGTGGCGGAGAAATCTCCCTGAGAA                   |
| PME1-HA donor R            | CATGTACAGACATTACCAAACCTGAGGATTTACATGTGGGGACAGGTGAATAGGGCGAATTGGAGCTCC                   |
| PME1-HA screen F           | CTGGACCTGGCGAACAGATT                                                                    |
| PME1-HA screen R           | CTCCTATCGGAGAGGGGGAG                                                                    |

---

---

|                       |                                                                        |
|-----------------------|------------------------------------------------------------------------|
| PR61-HA sgRNA F       | AGTTGTACACATATACGTGAGGAG                                               |
| PR61-HA sgRNA R       | AAACCTCCTCACGTATATGTGTAC                                               |
| PR61-HA donor F       | GGCGGGGAGGACGCGTTCTTGGTTCGCTTTTCCGCCGACGCGACTTTTGGCGGAGAAATCTCCCTGAGAA |
| PR61-HA donor R       | AACTTTGAGGAAGACGTCGAACGCGCACACCTTCTCCCGCAAGAGCATAGGGCGAATTGGAGCTCC     |
| PR61-HA screen F      | ACCAGCAACTCACCTACTGC                                                   |
| PR61-HA screen R      | CCCCCGGACAGAACAATACC                                                   |
| PP2Ac $\alpha$ qPCR F | GTCACCATTTTCTCTGCGCC                                                   |
| PP2Ac $\alpha$ qPCR R | CTTGCAGAAGCGACGGATTG                                                   |
| PP2Ac $\beta$ qPCR F  | ATTGGGTCCGAGTGCTTCTG                                                   |
| PP2Ac $\beta$ qPCR R  | TGTCGTAGGGGTCTGACCAT                                                   |
| PP4c qPCR F           | GAGCTCTTTCGTGTGGGGAA                                                   |
| PP4c qPCR R           | GGGTACCGAACTTTCAGGG                                                    |
| PP6c qPCR F           | GGGGCCTCACATGGAATCAA                                                   |
| PP6c qPCR R           | ACGCCTTCTTGTCGAGAGTG                                                   |
| PP1c qPCR F           | CACGGATTGCTTCAACTGCC                                                   |
| PP1c qPCR R           | CAGTGGGCCTGACAATCCTT                                                   |
| PR53 qPCR F           | TTCTTCCCCGCTTTTCGAC                                                    |
| PR53 qPCR R           | GGAAACGCATGAAAGCCTGG                                                   |
| PR61 qPCR F           | GTGGAACAACGAGCACATCG                                                   |
| PR61 qPCR R           | CCTCTTGCTGCTTGCCTTTT                                                   |
| PR70 qPCR F           | CCACTACCTCTGGTCTCGGA                                                   |
| PR70 qPCR R           | CCAAGCACCGTGGTTTTTCAG                                                  |
| LCMT1-HA F            | TAGAAGACACCGACTCTAGAATGTCGTCTTATTTATCGTC                               |
| LCMT1-HA R            | TTGTAATCCAGAGGTTGATTTCAAGCGTAGTCTGGGACGTCGTATGGGTAATTCATGCCTTCGTAGATCT |
| PME1-HA F             | TAGAAGACACCGACTCTAGAATGGATAACGACTTCTTTCTTCC                            |
| PME1-HA R             | TTGTAATCCAGAGGTTGATTTCAAGCGTAGTCTGGGACGTCGTATGGGTAACCTCGCAGGCTTCGGCGCA |

---



---

|                         |                                                                     |
|-------------------------|---------------------------------------------------------------------|
| PP2A $\alpha$ -Flag F   | TAGAAGACACCGACTCTAGAATGTCGGGTGCAACTCCA                              |
| PP2A $\alpha$ -Flag R   | TTGTAATCCAGAGGTTGATTTTACTTATCGTCATCGTCTTTGTAATCCAGGAAGTAGTCCGGAATTC |
| LCMT1-pET30a F          | CGGGATCCATGTCGTCTTATTTATCGTCTCCCC                                   |
| LCMT1-pET30a R          | GCTCTAGAATTCATGCCTTCGTAGATCTGCTT                                    |
| PME1-pET30a F           | CGGAATTCATGGATAACGACTTCTTTCTTCCAC                                   |
| PME1-pET30a R           | CCGCTCGAGACTCGCAGGCTTCGGCGCAGAGTG                                   |
| PP2A $\alpha$ -pET30a F | CGGGATCCATGTCGGGTGCAACTCCAG                                         |
| PP2A $\alpha$ -pET30a R | GCTCTAGATCACAGGAAGTAGTCCGGAATTCGT                                   |

---
